# Supplementary material for: Extracting Features from Poincaré Plots to Distinguish Congestive Heart Failure Patients According to NYHA Classes
Source: MDPI journal article supplement (doi:10.3390/bioengineering8100138), 2021-10-03
Supplement: s1 [file s1]

**Table S1.** Bivariate Pearson's correlation among all the independent variables

|     |                       | L       | HVE     | A      | P      | Np      | Dp      | Px     | Py      | Pz      |
|-----|-----------------------|---------|---------|--------|--------|---------|---------|--------|---------|---------|
| L   | Pearson's Correlation | 1       | ,477**  | ,488** | ,273** | ,569**  | -,588** | ,798** | ,882**  | ,598**  |
|     | Sign. (p-value)       |         | ,000    | ,000   | ,000   | ,000    | ,000    | ,000   | ,000    | ,000    |
|     | N                     | 199     | 199     | 199    | 199    | 198     | 198     | 198    | 198     | 198     |
| HVE | Pearson's Correlation | ,477**  | 1       | ,377** | ,025   | ,362**  | -,300** | ,396** | ,428**  | ,198**  |
|     | Sign. (p-value)       | ,000    |         | ,000   | ,722   | ,000    | ,000    | ,000   | ,000    | ,005    |
|     | N                     | 199     | 199     | 199    | 199    | 198     | 198     | 198    | 198     | 198     |
| A   | Pearson's Correlation | ,488**  | ,377**  | 1      | ,191** | ,357**  | ,169*   | ,614** | ,751**  | ,309**  |
|     | Sign. (p-value)       | ,000    | ,000    |        | ,007   | ,000    | ,017    | ,000   | ,000    | ,000    |
|     | N                     | 199     | 199     | 199    | 199    | 198     | 198     | 198    | 198     | 198     |
| P   | Pearson's Correlation | ,273**  | ,025    | ,191** | 1      | ,148*   | -,020   | ,346** | ,296**  | ,216**  |
|     | Sign. (p-value)       | ,000    | ,722    | ,007   |        | ,037    | ,774    | ,000   | ,000    | ,002    |
|     | N                     | 199     | 199     | 199    | 199    | 198     | 198     | 198    | 198     | 198     |
| Np  | Pearson's Correlation | ,569**  | ,362**  | ,357** | ,148*  | 1       | -,451** | ,441** | ,553**  | ,570**  |
|     | Sign. (p-value)       | ,000    | ,000    | ,000   | ,037   |         | ,000    | ,000   | ,000    | ,000    |
|     | N                     | 198     | 198     | 198    | 198    | 198     | 198     | 198    | 198     | 198     |
| Dp  | Pearson's Correlation | -,588** | -,300** | ,169*  | -,020  | -,451** | 1       | -,157* | -,337** | -,467** |
|     | Sign. (p-value)       | ,000    | ,000    | ,017   | ,774   | ,000    |         | ,027   | ,000    | ,000    |
|     | N                     | 198     | 198     | 198    | 198    | 198     | 198     | 198    | 198     | 198     |
| Px  | Pearson's Correlation | ,798**  | ,396**  | ,614** | ,346** | ,441**  | -,157*  | 1      | ,889**  | ,354**  |
|     | Sign. (p-value)       | ,000    | ,000    | ,000   | ,000   | ,000    | ,027    |        | ,000    | ,000    |
|     | N                     | 198     | 198     | 198    | 198    | 198     | 198     | 198    | 198     | 198     |
| Py  | Pearson's Correlation | ,882**  | ,428**  | ,751** | ,296** | ,553**  | -,337** | ,889** | 1       | ,560**  |
|     | Sign. (p-value)       | ,000    | ,000    | ,000   | ,000   | ,000    | ,000    | ,000   |         | ,000    |
|     | N                     | 198     | 198     | 198    | 198    | 198     | 198     | 198    | 198     | 198     |
| Pz  | Pearson's Correlation | ,598**  | ,198**  | ,309** | ,216** | ,570**  | -,467** | ,354** | ,560**  | 1       |
|     | Sign. (p-value)       | ,000    | ,005    | ,000   | ,002   | ,000    | ,000    | ,000   | ,000    |         |
|     | N                     | 198     | 198     | 198    | 198    | 198     | 198     | 198    | 198     | 198     |

\*\* Significant at 0,01.

\* Significant at 0,05.

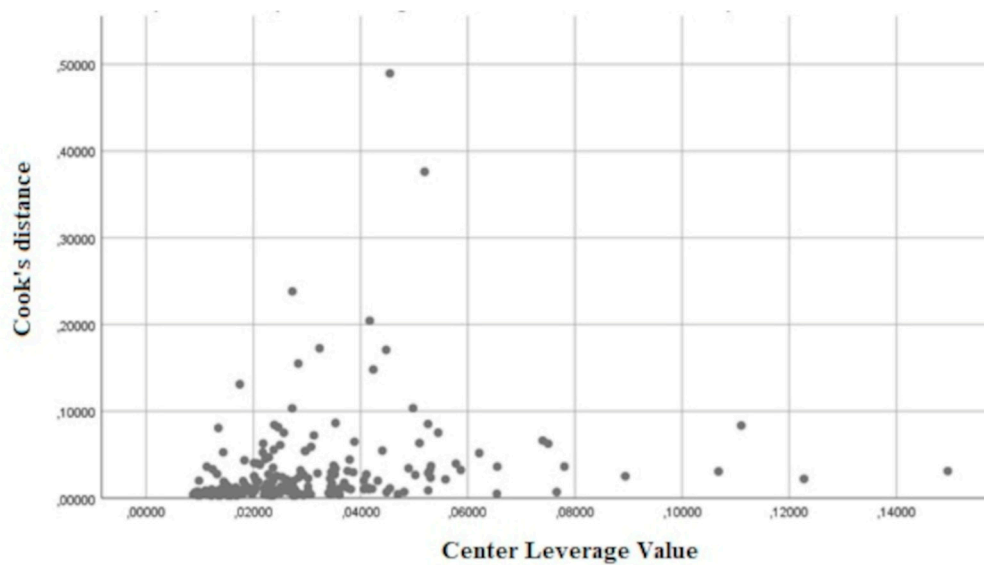

**Figure S1.** Outliers were found through the Cook's distance Vs Center Leverage Value graph
